# Supplementary material for: Genome-Wide Analysis of Sheep Artificially or Naturally Infected with Gastrointestinal Nematodes
Source: MDPI journal article supplement (doi:10.3390/genes14071342), 2023-06-26
Supplement: s1 [file s1]

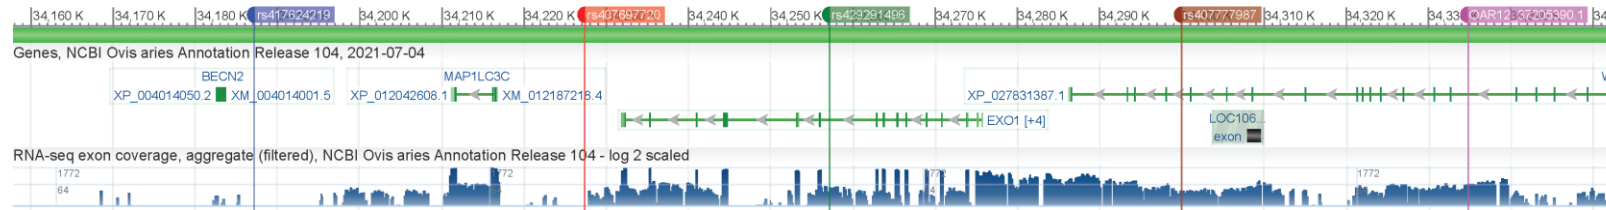

**Supplemental Figure S1.** A 147 kb region of interest, containing 5 SNP with  $r^2=1$  was identified in Dorper x White Dorper lambs associated with an increase in FEC. Included within this region are the genes *MAP1LC3C*, *EXO1* and *WDR64*. Image was created using the Genome Data Viewer from the National Center for Biotechnology Information ([https://www.ncbi.nlm.nih.gov/genome/gdv/browser/genome/?id=GCF\\_016772045.1](https://www.ncbi.nlm.nih.gov/genome/gdv/browser/genome/?id=GCF_016772045.1) )
