# Supplementary material for: Genome-Wide Analysis of Sheep Artificially or Naturally Infected with Gastrointestinal Nematodes
Source: MDPI journal article supplement (doi:10.3390/genes14071342), 2023-06-26
Supplement: s1 [file s1]

**Supplemental Table S2.** List of gene ontology biological processes and corresponding term IDs associated with candidate genes identified in both the artificial and natural parasite challenge GWAS.

| <b>Analyses</b> | <b>Phentoype</b> | <b>Candidate Gene</b> | <b>Gene Ontology Biological Process Term</b>                        | <b>Gene Ontology ID</b> |
|-----------------|------------------|-----------------------|---------------------------------------------------------------------|-------------------------|
| Art. Challenge  | FEC 35 dpi       | <i>AHNAK</i>          | regulation of RNA splicing                                          | GO:0043484              |
| Art. Challenge  | FEC 35 dpi       | <i>AHNAK</i>          | regulation of voltage-gated calcium channel activity                | GO:1901385              |
| Art. Challenge  | FEC 35 dpi       | <i>CEP350</i>         | microtubule anchoring                                               | GO:0034453              |
| Art. Challenge  | FEC 35 dpi       | <i>CEP350</i>         | protein localization to centrosome                                  | GO:0071539              |
| Art. Challenge  | FEC 35 dpi       | <i>CEP350</i>         | non-motile cilium assembly                                          | GO:1905515              |
| Art. Challenge  | FEC 35 dpi       | <i>CTIF</i>           | nuclear-transcribed mRNA catabolic process, nonsense-mediated decay | GO:0000184              |
| Art. Challenge  | FEC 35 dpi       | <i>CTIF</i>           | regulation of translational initiation                              | GO:0006446              |
| Art. Challenge  | FEC 35 dpi       | <i>DERL2</i>          | suckling behavior                                                   | GO:0001967              |
| Art. Challenge  | FEC 35 dpi       | <i>DERL2</i>          | positive regulation of cell population proliferation                | GO:0008284              |
| Art. Challenge  | FEC 35 dpi       | <i>DERL2</i>          | positive regulation of cell growth                                  | GO:0030307              |
| Art. Challenge  | FEC 35 dpi       | <i>DERL2</i>          | ubiquitin-dependent ERAD pathway                                    | GO:0030433              |
| Art. Challenge  | FEC 35 dpi       | <i>DERL2</i>          | endoplasmic reticulum unfolded protein response                     | GO:0030968              |
| Art. Challenge  | FEC 35 dpi       | <i>DERL2</i>          | retrograde protein transport, ER to cytosol                         | GO:0030970              |
| Art. Challenge  | FEC 35 dpi       | <i>DERL2</i>          | negative regulation of retrograde protein transport, ER to cytosol  | GO:1904153              |
| Art. Challenge  | FEC 35 dpi       | <i>GALNT6</i>         | protein O-linked glycosylation via threonine                        | GO:0018243              |
| Art. Challenge  | FEC 35 dpi       | <i>IGF1R</i>          | immune response                                                     | GO:0006955              |
| Art. Challenge  | FEC 35 dpi       | <i>IGF1R</i>          | positive regulation of cell population proliferation                | GO:0008284              |
| Art. Challenge  | FEC 35 dpi       | <i>IGF1R</i>          | positive regulation of cell migration                               | GO:0030335              |
| Art. Challenge  | FEC 35 dpi       | <i>IGF1R</i>          | peptidyl-tyrosine autophosphorylation                               | GO:0038083              |

|                |            |               |                                                           |            |
|----------------|------------|---------------|-----------------------------------------------------------|------------|
| Art. Challenge | FEC 35 dpi | <i>IGF1R</i>  | negative regulation of apoptotic process                  | GO:0043066 |
| Art. Challenge | FEC 35 dpi | <i>IGF1R</i>  | negative regulation of MAPK cascade                       | GO:0043409 |
| Art. Challenge | FEC 35 dpi | <i>IGF1R</i>  | transcytosis                                              | GO:0045056 |
| Art. Challenge | FEC 35 dpi | <i>IGF1R</i>  | regulation of JNK cascade                                 | GO:0046328 |
| Art. Challenge | FEC 35 dpi | <i>IGF1R</i>  | phosphatidylinositol-mediated signaling                   | GO:0048015 |
| Art. Challenge | FEC 35 dpi | <i>IGF1R</i>  | amyloid-beta clearance                                    | GO:0097242 |
| Art. Challenge | FEC 35 dpi | <i>IGF1R</i>  | cellular response to amyloid-beta                         | GO:1904646 |
| Art. Challenge | FEC 35 dpi | <i>RHOA</i>   | small GTPase mediated signal transduction                 | GO:0007264 |
| Art. Challenge | FEC 35 dpi | <i>RHOA</i>   | wound healing, spreading of cells                         | GO:0044319 |
| Art. Challenge | FEC 35 dpi | <i>RHOA</i>   | skeletal muscle satellite cell migration                  | GO:1902766 |
| Art. Challenge | FEC 35 dpi | <i>TULP1</i>  | phagocytosis, recognition                                 | GO:0006910 |
| Art. Challenge | FEC 35 dpi | <i>TULP1</i>  | dendrite development                                      | GO:0016358 |
| Art. Challenge | FEC 35 dpi | <i>TULP1</i>  | eye photoreceptor cell development                        | GO:0042462 |
| Art. Challenge | FEC 35 dpi | <i>TULP1</i>  | photoreceptor cell maintenance                            | GO:0045494 |
| Art. Challenge | FEC 35 dpi | <i>TULP1</i>  | positive regulation of phagocytosis                       | GO:0050766 |
| Art. Challenge | FEC 35 dpi | <i>TULP1</i>  | detection of light stimulus involved in visual perception | GO:0050908 |
| Art. Challenge | FEC 35 dpi | <i>TULP1</i>  | retina development in camera-type eye                     | GO:0060041 |
| Art. Challenge | FEC 35 dpi | <i>TULP1</i>  | protein localization to photoreceptor outer segment       | GO:1903546 |
| Art. Challenge | FEC 35 dpi | <i>SCUBE1</i> | positive regulation of smoothened signaling pathway       | GO:0045880 |
| Art. Challenge | FEC Slope  | <i>CAPZB</i>  | actin polymerization or depolymerization                  | GO:0008154 |
| Art. Challenge | FEC Slope  | <i>CAPZB</i>  | lamellipodium assembly                                    | GO:0030032 |
| Art. Challenge | FEC Slope  | <i>CAPZB</i>  | barbed-end actin filament capping                         | GO:0051016 |
| Art. Challenge | PCV 35 dpi | <i>GLCE</i>   | heparan sulfate proteoglycan biosynthetic process         | GO:0015012 |

|                   |               |              |                                                                   |            |
|-------------------|---------------|--------------|-------------------------------------------------------------------|------------|
| Art.<br>Challenge | PCV 35<br>dpi | <i>GLCE</i>  | heparin biosynthetic process                                      | GO:0030210 |
| Art.<br>Challenge | PCV Slope     | <i>PTK2B</i> | positive regulation of cell-matrix adhesion                       | GO:0001954 |
| Art.<br>Challenge | PCV Slope     | <i>PTK2B</i> | sprouting angiogenesis                                            | GO:0002040 |
| Art.<br>Challenge | PCV Slope     | <i>PTK2B</i> | marginal zone B cell differentiation                              | GO:0002315 |
| Art.<br>Challenge | PCV Slope     | <i>PTK2B</i> | signal complex assembly                                           | GO:0007172 |
| Art.<br>Challenge | PCV Slope     | <i>PTK2B</i> | integrin-mediated signaling pathway                               | GO:0007229 |
| Art.<br>Challenge | PCV Slope     | <i>PTK2B</i> | positive regulation of cell population<br>proliferation           | GO:0008284 |
| Art.<br>Challenge | PCV Slope     | <i>PTK2B</i> | negative regulation of cell population<br>proliferation           | GO:0008285 |
| Art.<br>Challenge | PCV Slope     | <i>PTK2B</i> | regulation of cell shape                                          | GO:0008360 |
| Art.<br>Challenge | PCV Slope     | <i>PTK2B</i> | positive regulation of endothelial cell migration                 | GO:0010595 |
| Art.<br>Challenge | PCV Slope     | <i>PTK2B</i> | regulation of cGMP-mediated signaling                             | GO:0010752 |
| Art.<br>Challenge | PCV Slope     | <i>PTK2B</i> | regulation of macrophage chemotaxis                               | GO:0010758 |
| Art.<br>Challenge | PCV Slope     | <i>PTK2B</i> | positive regulation of neuron projection<br>development           | GO:0010976 |
| Art.<br>Challenge | PCV Slope     | <i>PTK2B</i> | negative regulation of bone mineralization                        | GO:0030502 |
| Art.<br>Challenge | PCV Slope     | <i>PTK2B</i> | positive regulation of actin filament<br>polymerization           | GO:0030838 |
| Art.<br>Challenge | PCV Slope     | <i>PTK2B</i> | regulation of inositol trisphosphate<br>biosynthetic process      | GO:0032960 |
| Art.<br>Challenge | PCV Slope     | <i>PTK2B</i> | tumor necrosis factor-mediated signaling<br>pathway               | GO:0033209 |
| Art.<br>Challenge | PCV Slope     | <i>PTK2B</i> | peptidyl-tyrosine autophosphorylation                             | GO:0038083 |
| Art.<br>Challenge | PCV Slope     | <i>PTK2B</i> | activation of Janus kinase activity                               | GO:0042976 |
| Art.<br>Challenge | PCV Slope     | <i>PTK2B</i> | negative regulation of apoptotic process                          | GO:0043066 |
| Art.<br>Challenge | PCV Slope     | <i>PTK2B</i> | negative regulation of potassium ion transport                    | GO:0043267 |
| Art.<br>Challenge | PCV Slope     | <i>PTK2B</i> | positive regulation of phosphatidylinositol 3-<br>kinase activity | GO:0043552 |
| Art.<br>Challenge | PCV Slope     | <i>PTK2B</i> | regulation of nitric oxide biosynthetic process                   | GO:0045428 |

|                |           |               |                                                                      |            |
|----------------|-----------|---------------|----------------------------------------------------------------------|------------|
| Art. Challenge | PCV Slope | <i>PTK2B</i>  | bone resorption                                                      | GO:0045453 |
| Art. Challenge | PCV Slope | <i>PTK2B</i>  | negative regulation of myeloid cell differentiation                  | GO:0045638 |
| Art. Challenge | PCV Slope | <i>PTK2B</i>  | positive regulation of angiogenesis                                  | GO:0045766 |
| Art. Challenge | PCV Slope | <i>PTK2B</i>  | positive regulation of JNK cascade                                   | GO:0046330 |
| Art. Challenge | PCV Slope | <i>PTK2B</i>  | vascular endothelial growth factor receptor signaling pathway        | GO:0048010 |
| Art. Challenge | PCV Slope | <i>PTK2B</i>  | positive regulation of peptidyl-tyrosine phosphorylation             | GO:0050731 |
| Art. Challenge | PCV Slope | <i>PTK2B</i>  | regulation of calcium-mediated signaling                             | GO:0050848 |
| Art. Challenge | PCV Slope | <i>PTK2B</i>  | positive regulation of nitric-oxide synthase activity                | GO:0051000 |
| Art. Challenge | PCV Slope | <i>PTK2B</i>  | regulation of release of sequestered calcium ion into cytosol        | GO:0051279 |
| Art. Challenge | PCV Slope | <i>PTK2B</i>  | chemokine-mediated signaling pathway                                 | GO:0070098 |
| Art. Challenge | PCV Slope | <i>PTK2B</i>  | positive regulation of ERK1 and ERK2 cascade                         | GO:0070374 |
| Art. Challenge | PCV Slope | <i>PTK2B</i>  | cellular response to retinoic acid                                   | GO:0071300 |
| Art. Challenge | PCV Slope | <i>PTK2B</i>  | cellular response to fluid shear stress                              | GO:0071498 |
| Art. Challenge | PCV Slope | <i>PTK2B</i>  | endothelin receptor signaling pathway                                | GO:0086100 |
| Art. Challenge | PCV Slope | <i>PTK2B</i>  | regulation of postsynaptic density assembly                          | GO:0099151 |
| Art. Challenge | PCV Slope | <i>PTK2B</i>  | positive regulation of ubiquitin-dependent protein catabolic process | GO:2000060 |
| Art. Challenge | PCV Slope | <i>PTK2B</i>  | regulation of establishment of cell polarity                         | GO:2000114 |
| Art. Challenge | PCV Slope | <i>PTK2B</i>  | regulation of actin cytoskeleton reorganization                      | GO:2000249 |
| Art. Challenge | PCV Slope | <i>PTK2B</i>  | positive regulation of B cell chemotaxis                             | GO:2000538 |
| Art. Challenge | PCV Slope | <i>TRIM14</i> | innate immune response                                               | GO:0045087 |
| Nat. Challenge | PW FEC    | <i>BRINP3</i> | positive regulation of neuron differentiation                        | GO:0045666 |
| Nat. Challenge | PW FEC    | <i>BRINP3</i> | negative regulation of mitotic cell cycle                            | GO:0045930 |
| Nat. Challenge | PW FEC    | <i>EXO1</i>   | humoral immune response mediated by circulating immunoglobulin       | GO:0002455 |

|                   |        |             |                                                  |            |
|-------------------|--------|-------------|--------------------------------------------------|------------|
| Nat.<br>Challenge | PW FEC | <i>EXO1</i> | mismatch repair                                  | GO:0006298 |
| Nat.<br>Challenge | PW FEC | <i>EXO1</i> | somatic hypermutation of immunoglobulin<br>genes | GO:0016446 |
| Nat.<br>Challenge | PW FEC | <i>EXO1</i> | isotype switching                                | GO:0045190 |
| Nat.<br>Challenge | PW FEC | <i>DNM3</i> | receptor internalization*                        | GO:0031623 |
| Nat.<br>Challenge | PW FEC | <i>DNM3</i> | synaptic vesicle endocytosis*                    | GO:0048488 |
