# Supplementary material for: Genome-Wide Analysis of Sheep Artificially or Naturally Infected with Gastrointestinal Nematodes
Source: MDPI journal article supplement (doi:10.3390/genes14071342), 2023-06-26
Supplement: s1 [file s1]

**Supplemental Table S1.** Linkage disequilibrium between significant SNP identified in GWAS with natural parasite challenge FEC. Values in the table were calculated with haplotype-based  $r^2$  method in PLINK v1.90.

| SNP1        | SNP2        | DWD   | RA    |
|-------------|-------------|-------|-------|
| rs415220805 | rs417624219 | 0.035 | 0.012 |
| rs415220805 | rs429291496 | 0.035 | 0.011 |
| rs415220805 | rs422997699 | 0.094 | 0.020 |
| rs417624219 | rs429291496 | 1.000 | 0.490 |
| rs417624219 | rs422997699 | 0.001 | 0.107 |
| rs429291496 | rs422997699 | 0.001 | 0.028 |
